# Supplementary material for: Syntheses, structures, and photoluminescence of five silver(i) coordination polymers based on tetrakis(imidazol-1-ylmethyl)methane
Source: Royal Society of Chemistry journal article supplement (doi:10.1039/c0ce00834f), 2011-01-01
Supplement: c0ce00834f.pdf [file c0ce00834f.pdf]

## Electronic supplementary information

### **Syntheses, structures, and photoluminescence of five silver(I) coordination polymers based on tetrakis(imidazol-1-ylmethyl)methane**

**Hong-Ye Bai, Jin Yang,\* Bo Liu, Jian-Fang Ma,\* Wei-Qiu Kan, Yun-Yu Liu and  
Ying-Ying Liu**

*Key Lab of Polyoxometalate Science, Department of Chemistry, Northeast Normal  
University, Changchun 130024, People's Republic of China*

\* Correspondence authors

E-mail: yangjinnenu@yahoo.com.cn (J. Yang)

E-mail: jianfangma@yahoo.com.cn (J.-F. Ma)

Fax: +86-431-85098620 (J.-F. Ma)

Table S1. Selected bond distances (Å) and angles (°) for **1**.

|                   |            |            |          |
|-------------------|------------|------------|----------|
| Ag(1)-N(4)#1      | 2.112(3)   | Ag(1)-N(1) | 2.117(3) |
| N(4)#1-Ag(1)-N(1) | 175.09(12) |            |          |

Symmetry transformations used to generate equivalent atoms:

#1 -x+1/2,y+1/2,-z+1/2.

Table S2. Selected bond distances (Å) and angles (°) for **2**.

|                       |             |                       |             |
|-----------------------|-------------|-----------------------|-------------|
| Ag(1)-N(1)            | 2.245(2)    | Ag(1)-Br(1)           | 2.6424(11)  |
| Ag(1)-Br(1)#1         | 2.7261(12)  | Ag(1)-Ag(1)#1         | 3.0327(12)  |
| Ag(1)-Ag(1)#3         | 3.1827(16)  | Ag(1)-Br(1)#3         | 3.0781(13)  |
| N(1)-Ag(1)-Br(1)      | 123.53(7)   | N(1)-Ag(1)-Br(1)#1    | 110.23(7)   |
| Br(1)-Ag(1)-Br(1)#1   | 116.57(2)   | N(1)-Ag(1)-Ag(1)#1    | 121.33(7)   |
| Br(1)-Ag(1)-Ag(1)#1   | 111.156(19) | Br(1)#1-Ag(1)-Ag(1)#1 | 54.31(3)    |
| N(1)-Ag(1)-Ag(1)#2    | 170.04(7)   | Br(1)-Ag(1)-Ag(1)#2   | 56.92(3)    |
| Br(1)#1-Ag(1)-Ag(1)#2 | 64.36(3)    | Ag(1)#1-Ag(1)-Ag(1)#2 | 63.30(3)    |
| N(1)-Ag(1)-Br(1)#3    | 89.18(7)    | Br(1)-Ag(1)-Br(1)#3   | 107.92(2)   |
| Br(1)#1-Ag(1)-Br(1)#3 | 103.624(19) | Ag(1)#1-Ag(1)-Br(1)#3 | 52.98(3)    |
| Ag(1)#2-Ag(1)-Br(1)#3 | 100.157(16) | N(1)-Ag(1)-Ag(1)#3    | 131.51(7)   |
| Br(1)-Ag(1)-Ag(1)#3   | 62.996(19)  | Br(1)#1-Ag(1)-Ag(1)#3 | 104.700(16) |
| Ag(1)#1-Ag(1)-Ag(1)#3 | 58.351(14)  | Br(1)#3-Ag(1)-Ag(1)#3 | 49.895(17)  |

Symmetry transformations used to generate equivalent atoms: #1 -x+1/2,y+1/2,-z+1/2;

#2 x,y,-z+1/2; #3 -x+3/2,-y+3/2,-z; #4 -x+1/2,y-1/2,-z+1/2; #5 -x+2,y,-z+1/2.

Table S3. Selected bond distances (Å) and angles (°) for **3**.

|                    |          |                      |            |
|--------------------|----------|----------------------|------------|
| Ag(1)-N(3)#1       | 2.091(7) | Ag(1)-N(2)           | 2.097(8)   |
| Ag(1)-Ag(1)#2      | 3.212(2) | Ag(2)-N(6)           | 2.086(8)   |
| Ag(2)-N(7)#3       | 2.146(8) | Ag(2)-Ag(2)#2        | 3.3288(19) |
| N(3)#1-Ag(1)-N(2)  | 166.7(3) | N(3)#1-Ag(1)-Ag(1)#2 | 77.8(3)    |
| N(2)-Ag(1)-Ag(1)#2 | 95.7(3)  | N(6)-Ag(2)-N(7)#3    | 172.8(4)   |
| N(6)-Ag(2)-Ag(2)#2 | 73.6(3)  | N(7)#3-Ag(2)-Ag(2)#2 | 107.7(3)   |

Table S3b. Hydrogen bonds for **3** (Å and °).

| D-H...A               | d(D-H)  | d(H...A) | d(D...A) | <(DHA)  |
|-----------------------|---------|----------|----------|---------|
| O(1W)-H(1C)...O(1)    | 0.85(3) | 2.35(19) | 2.95(2)  | 127(20) |
| O(1W)-H(1D)...O(1W)#2 | 0.85(3) | 2.3(2)   | 2.77(2)  | 113(21) |

Symmetry transformations used to generate equivalent atoms: #1 x+1/2,-y+1/2,z+1/2;

#2 x+2,y,-z+3/2; #3 -x+2,-y+1,-z+2.

Table S4. Selected bond distances (Å) and angles (°) for **4**.

|                    |            |                      |            |
|--------------------|------------|----------------------|------------|
| Ag(1)-N(1)         | 2.157(3)   | Ag(1)-N(6)#1         | 2.163(3)   |
| Ag(1)-O(2)         | 2.421(3)   | Ag(1)-Ag(2)#2        | 3.1541(14) |
| Ag(2)-N(4)         | 2.118(3)   | Ag(2)-N(8)#3         | 2.127(3)   |
| Ag(2)-Ag(1)#2      | 3.1541(14) | N(1)-Ag(1)-N(6)#1    | 142.85(10) |
| N(1)-Ag(1)-O(2)    | 119.78(9)  | N(6)#1-Ag(1)-O(2)    | 96.96(9)   |
| N(1)-Ag(1)-Ag(2)#2 | 107.06(8)  | N(6)#1-Ag(1)-Ag(2)#2 | 84.10(7)   |

|                    |          |                      |            |
|--------------------|----------|----------------------|------------|
| O(2)-Ag(1)-Ag(2)#2 | 78.48(6) | N(4)-Ag(2)-N(8)#3    | 166.78(10) |
| N(4)-Ag(2)-Ag(1)#2 | 98.59(7) | N(8)#3-Ag(2)-Ag(1)#2 | 88.11(8)   |

Table S4b. Hydrogen bonds for **4** (Å and °).

| D-H...A                           | d(D-H)    | d(H...A) | d(D...A) | <(DHA)  |
|-----------------------------------|-----------|----------|----------|---------|
| O(1W)-H(1C)...O(1) <sup>#2</sup>  | 0.852(19) | 2.07(2)  | 2.914(4) | 173(4)  |
| O(1W)-H(1D)...O(1)                | 0.855(19) | 1.93(2)  | 2.783(4) | 173(5)  |
| O(2W)-H(2D)...O(3) <sup>#6</sup>  | 0.86(2)   | 2.38(7)  | 2.846(5) | 114(6)  |
| O(2W)-H(2C)...O(3)                | 0.85(2)   | 1.97(3)  | 2.785(5) | 160(6)  |
| O(4W)-H(4D)...O(1)                | 0.83(2)   | 2.01(4)  | 2.803(4) | 159(10) |
| O(4W)-H(4C)...O(4) <sup>#7</sup>  | 0.85(2)   | 2.07(6)  | 2.817(6) | 146(9)  |
| O(3W)-H(3D)...O(2W) <sup>#7</sup> | 0.85(2)   | 2.23(3)  | 3.070(7) | 170(9)  |

Symmetry transformations used to generate equivalent atoms: #1 x,y+1,z; #2 -x+1,-y+1,-z+1; #3 x,y,z-1; #4 x,y-1,z; #5 x,y,z+1; #6 -x+2,-y+2,-z; #7 -x+2,-y+1,-z.

Table S5. Selected bond distances (Å) and angles (°) for **5**.

|                   |            |                   |            |
|-------------------|------------|-------------------|------------|
| Ag(1)-N(8)#1      | 2.133(3)   | Ag(1)-N(4)        | 2.141(3)   |
| Ag(2)-N(6)        | 2.127(3)   | Ag(2)-N(1)#2      | 2.135(3)   |
| N(8)#1-Ag(1)-N(4) | 167.85(10) | N(6)-Ag(2)-N(1)#2 | 172.14(12) |

Table S5b. Hydrogen bonds for **5** (Å and °).

| D-H...A               | d(D-H)    | d(H...A) | d(D...A) | <(DHA) |
|-----------------------|-----------|----------|----------|--------|
| O(1W)-H(1D)...O(1)    | 0.848(19) | 1.97(2)  | 2.790(4) | 162(5) |
| O(1W)-H(1C)...O(3)    | 0.843(19) | 2.16(3)  | 2.903(4) | 146(4) |
| O(2W)-H(2C)...O(3W)   | 0.849(19) | 1.95(3)  | 2.770(5) | 163(6) |
| O(2W)-H(2D)...O(3)    | 0.878(19) | 2.01(4)  | 2.805(5) | 150(6) |
| O(3W)-H(3C)...O(1W)   | 0.848(19) | 1.90(2)  | 2.735(5) | 168(6) |
| O(3W)-H(3D)...O(6W)#1 | 0.855(19) | 2.15(4)  | 2.903(7) | 146(6) |
| O(4W)-H(4C)...O(4)    | 0.861(19) | 1.87(3)  | 2.715(5) | 165(5) |
| O(4W)-H(4D)...O(5W)#6 | 0.847(19) | 2.15(5)  | 2.828(6) | 137(6) |
| O(5W)-H(5D)...O(7W)   | 0.79(2)   | 2.51(8)  | 2.989(9) | 120(7) |
| O(8W)-H(8C)...O(2W)#7 | 0.865(19) | 2.17(2)  | 3.030(4) | 171(5) |
| O(8W)-H(8D)...O(1)#5  | 0.846(19) | 2.02(2)  | 2.850(4) | 165(5) |

Symmetry transformations used to generate equivalent atoms:

#1 -x+1/2,y+1/2,-z+1/2; #2 -x-1,-y+2,-z; #3 -x,-y+2,-z; #4 -x+2,-y+2,-z+1; #5 -x+1/2,y-1/2,-z+1/2; #6 x,y+1,z; #7 -x+1,-y+1,-z+1.

Table S6. Bond valence sum calculations for compounds **1-5**.

| Compound | <b>1</b>   | <b>2</b>   | <b>3</b>                 | <b>4</b>                 | <b>5</b>                  |
|----------|------------|------------|--------------------------|--------------------------|---------------------------|
| BVS      | Ag1: 0.979 | Ag1: 1.016 | Ag1: 1.033<br>Ag2: 0.979 | Ag1: 1.055<br>Ag2: 0.958 | Ag1: 0.921;<br>Ag2: 0.936 |

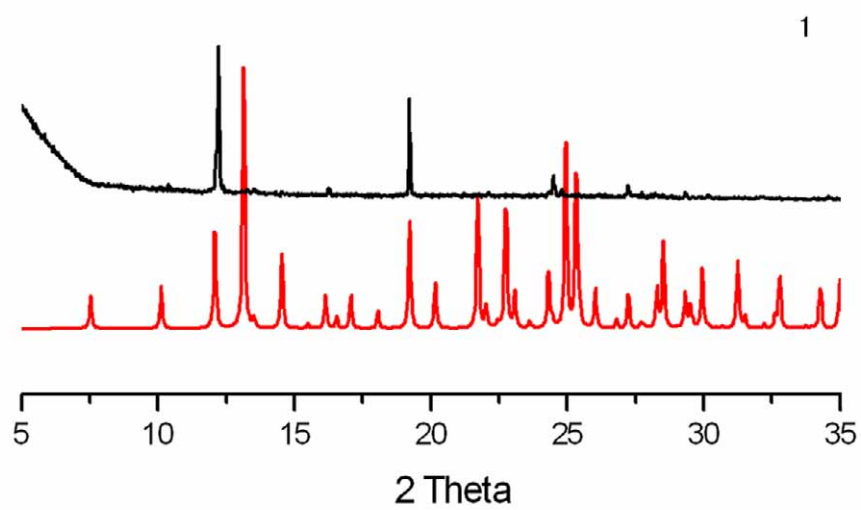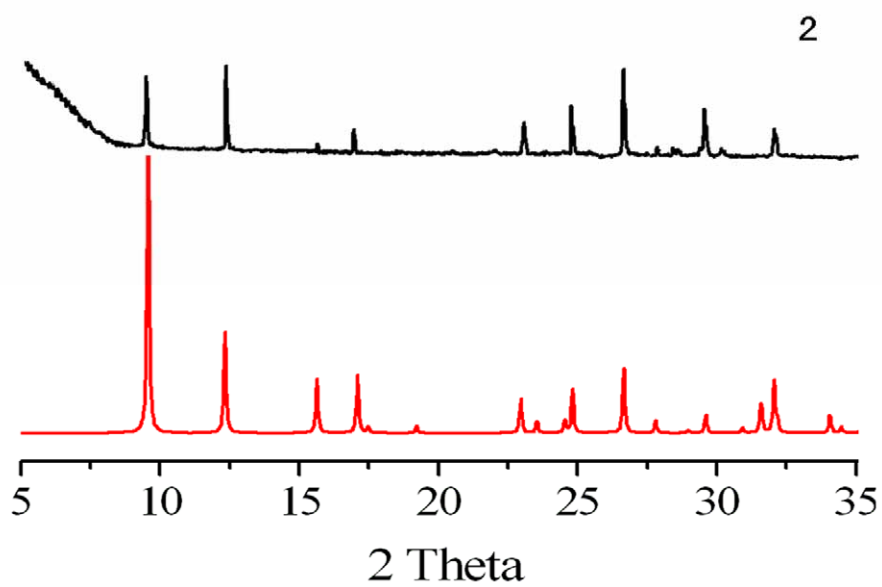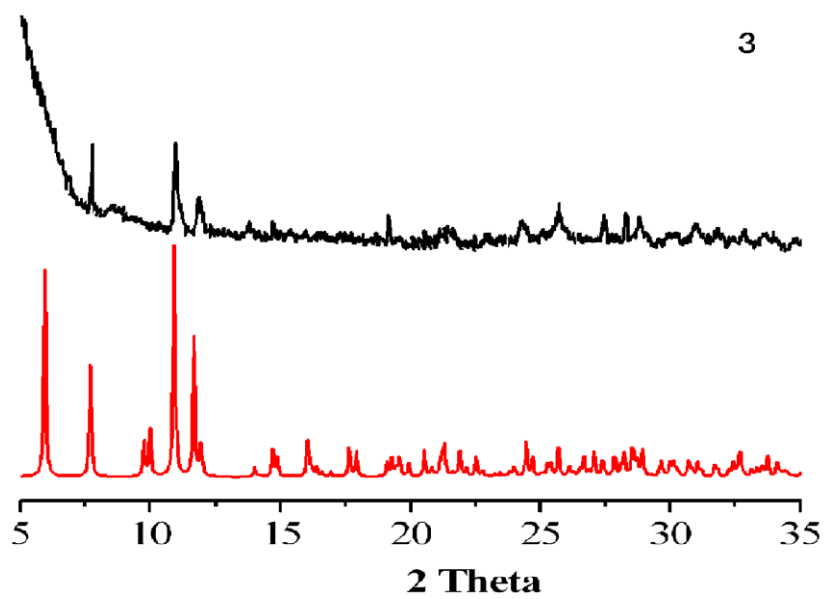

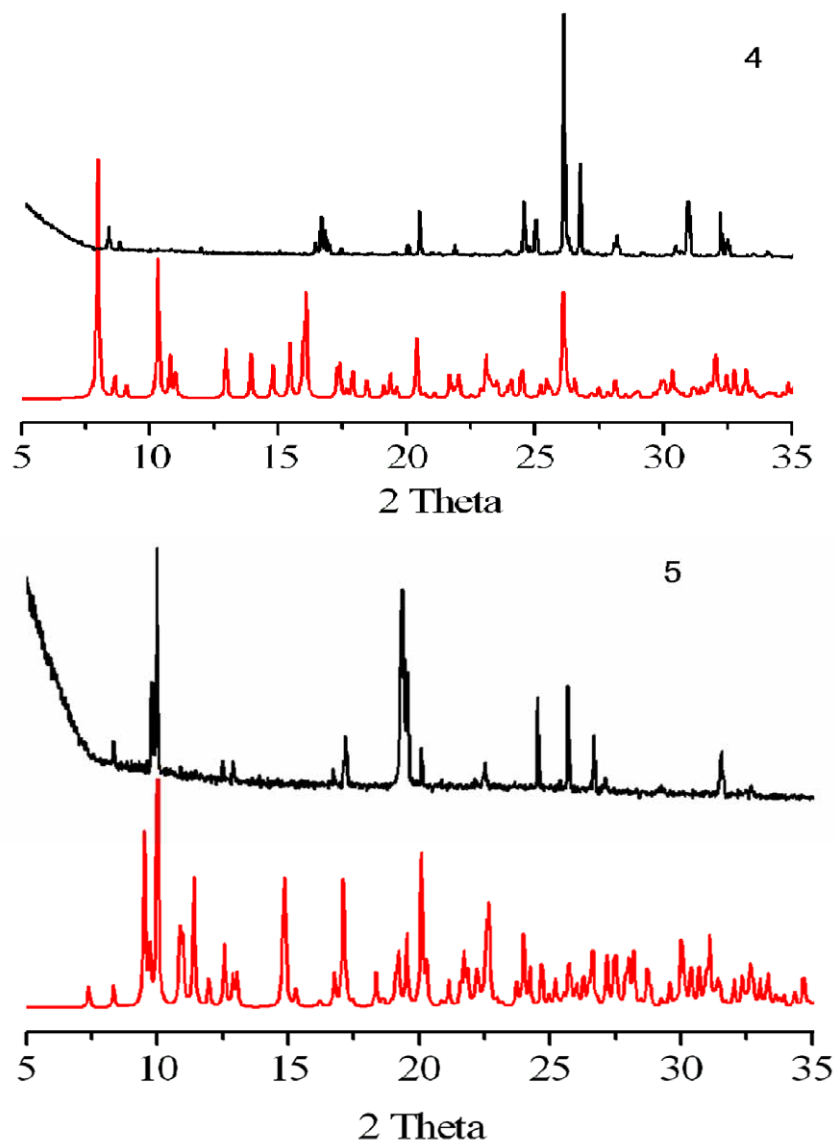

Fig. S1. The simulated (red) and experimental (black) XRPD patterns for compounds 1-5.

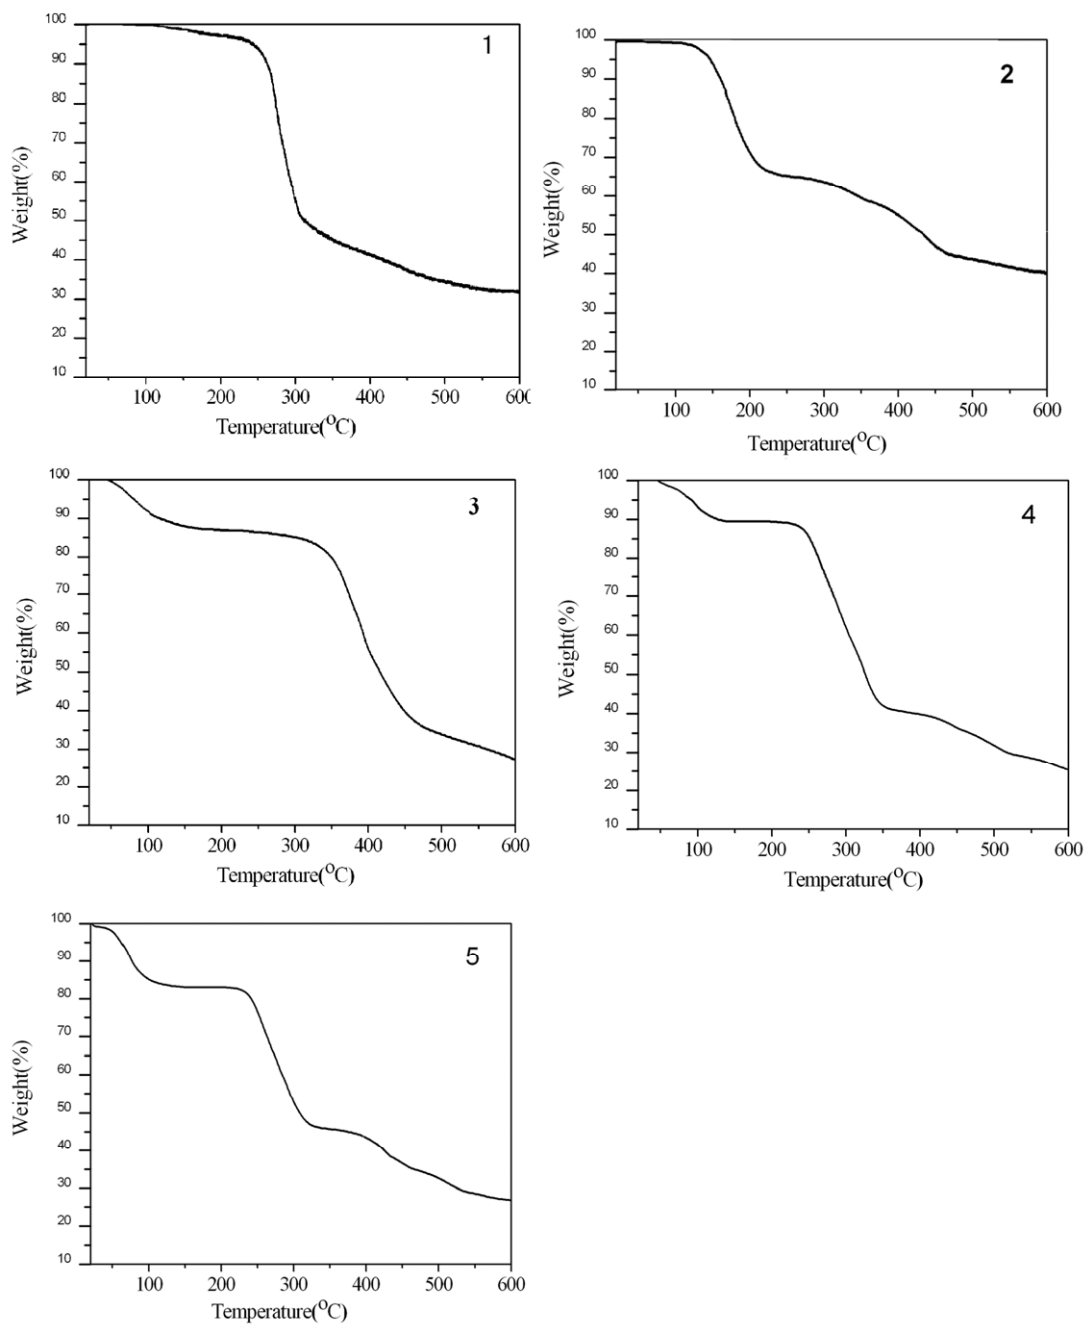

Fig. S2. The TGA curves of compounds 1-5.
